# Supplementary material for: Osteoclast indices in osteogenesis imperfecta: systematic review and meta-analysis
Source: PubMed Central journal article supplement (PMC11450326; doi:10.1093/jbmrpl/ziae112), 2024-08-21
Supplement: revised_supplemental_material_2024_07_25_ziae112.pdf [file revised_supplemental_material_2024_07_25_ziae112.pdf]

## Supplemental Materials

Supporting information for the manuscript “Osteoclast indices in osteogenesis imperfecta: systematic review and meta-analysis” Sirion Aksornthong, Priyesh Patel, Svetlana V. Komarova

### Supplemental Method 1: Search strategy

Example of search strategy applied for Web of Science database

1 = (TS = (osteogenesis imperfecta))

2 = (TS =(fragilitas ossium))

3 = (TS =(vrolik disease))

4 = #1 OR #2 OR #3

5 = (TS =(osteoclast\*))

6 = (TS =(osteoclastogenesis))

7 = #5 OR #6

8 = #4 AND #7

url: <https://www.webofscience.com/wos/woscc/summary/e018209c-afb0-4ec4-92da-3d5919865c98-933dc204/relevance/1>

### Supplemental Method 2: Quality checklist

#### S2.1 Description of checklist for quality assessment for clinical study

- 1) Was the diagnosis of OI patient (clinical/genetic, type, severity) well defined?
- 2) Was the demographic background of the OI population clearly described?
- 3) Did the control subjects come from a similar demographic background to the OI patients?
- 4) Were OI patient treatments well described including medication frequency and timing?
- 5) Was ethics approval/ informed consent stated in the manuscript?
- 6) Was the process of OI patients and control selection well described?
- 7) Did the authors specify all aspects of the process of sample acquisition?
- 8) Was the method for outcome assessment consistent across all participants?
- 9) Did the authors perform blind analysis for all outcomes and study groups?
- 10) Did the authors analyze outcomes from all participants, if not, did they describe how to choose the subset for an assessment?
- 11) Was the statistical method of analysis clearly described?
- 12) Was the analysis of the outcome separated by sex?
- 13) Were data tables and graphs presented in good quality?
- 14) Were the abbreviations and symbols used in the study well-defined in all the figures and tables?
- 15) Were the units of assessed outcomes correct and well-defined?
- 16) Did the article publish in peer review journal?
- 17) Did the objective of the study align with the meta-analytic project?

#### S2.2 Description of checklist for quality assessment for animal study

- 1) Was the OI model clearly described?
- 2) Was the background described and WT mice matched with the OI (age-match and littermates)?
- 3) Were the WT and OI animals kept in the same conditions (housing, diet manipulation, treatment regimen)?
- 4) Was the ethics approval stated in the manuscript?
- 5) Did the authors clearly describe the frequency/timeframe of sampling/treatment?
- 6) Was the animal group allocation process well described?
- 7) Did the authors specify all aspects of the process of sample acquisition?
- 8) Was the method for outcome assessment consistent across all animals?
- 9) Did the authors perform blind analysis for all outcomes and study groups?
- 10) Was the sample size justification, power description, or variance and effect estimates well defined?
- 11) Was the method of the statistical analysis reported?
- 12) Was the analysis of the outcome separated by sex?
- 13) Were data tables and graphs reported with good quality?
- 14) Were the abbreviations and symbols used in the study well-defined in all the figures and tables?
- 15) Were the units of assessed outcomes correct and well-defined?

- 16) Was the article published in a peer-reviewed journal?  
 17) Was the objective of the study aligned with the meta-analytic project?

**Supplemental Table 1: Prisma Checklist**

| Section and Topic             | Item # | Checklist item                                                                                                                                                                                                                                                                                       | Location where item is reported |
|-------------------------------|--------|------------------------------------------------------------------------------------------------------------------------------------------------------------------------------------------------------------------------------------------------------------------------------------------------------|---------------------------------|
| <b>TITLE</b>                  |        |                                                                                                                                                                                                                                                                                                      |                                 |
| Title                         | 1      | Identify the report as a systematic review.                                                                                                                                                                                                                                                          | 1                               |
| <b>ABSTRACT</b>               |        |                                                                                                                                                                                                                                                                                                      |                                 |
| Abstract                      | 2      | See the PRISMA 2020 for Abstracts checklist.                                                                                                                                                                                                                                                         | 2                               |
| <b>INTRODUCTION</b>           |        |                                                                                                                                                                                                                                                                                                      |                                 |
| Rationale                     | 3      | Describe the rationale for the review in the context of existing knowledge.                                                                                                                                                                                                                          | 3                               |
| Objectives                    | 4      | Provide an explicit statement of the objective(s) or question(s) the review addresses.                                                                                                                                                                                                               | 3,4                             |
| <b>METHODS</b>                |        |                                                                                                                                                                                                                                                                                                      |                                 |
| Eligibility criteria          | 5      | Specify the inclusion and exclusion criteria for the review and how studies were grouped for the syntheses.                                                                                                                                                                                          | 4                               |
| Information sources           | 6      | Specify all databases, registers, websites, organisations, reference lists and other sources searched or consulted to identify studies. Specify the date when each source was last searched or consulted.                                                                                            | 4                               |
| Search strategy               | 7      | Present the full search strategies for all databases, registers and websites, including any filters and limits used.                                                                                                                                                                                 | S2                              |
| Selection process             | 8      | Specify the methods used to decide whether a study met the inclusion criteria of the review, including how many reviewers screened each record and each report retrieved, whether they worked independently, and if applicable, details of automation tools used in the process.                     | 4                               |
| Data collection process       | 9      | Specify the methods used to collect data from reports, including how many reviewers collected data from each report, whether they worked independently, any processes for obtaining or confirming data from study investigators, and if applicable, details of automation tools used in the process. | 4                               |
| Data items                    | 10a    | List and define all outcomes for which data were sought. Specify whether all results that were compatible with each outcome domain in each study were sought (e.g. for all measures, time points, analyses), and if not, the methods used to decide which results to collect.                        | 4, S4, T1, T2                   |
|                               | 10b    | List and define all other variables for which data were sought (e.g. participant and intervention characteristics, funding sources). Describe any assumptions made about any missing or unclear information.                                                                                         | 4, S4, T1, T2                   |
| Study risk of bias assessment | 11     | Specify the methods used to assess risk of bias in the included studies, including details of the tool(s) used, how many reviewers assessed each study and whether they worked independently, and if applicable, details of automation tools used in the process.                                    | 6                               |
| Effect measures               | 12     | Specify for each outcome the effect measure(s) (e.g. risk ratio, mean difference) used in the synthesis or presentation of results.                                                                                                                                                                  | 4-5                             |
| Synthesis methods             | 13a    | Describe the processes used to decide which studies were eligible for each synthesis (e.g. tabulating the study intervention characteristics and comparing against the planned groups for each synthesis (item #5)).                                                                                 | 5                               |
|                               | 13b    | Describe any methods required to prepare the data for presentation or synthesis, such as handling of missing                                                                                                                                                                                         | 4-7                             |

| Section and Topic                        | Item # | Checklist item                                                                                                                                                                                                                                                                       | Location where item is reported |
|------------------------------------------|--------|--------------------------------------------------------------------------------------------------------------------------------------------------------------------------------------------------------------------------------------------------------------------------------------|---------------------------------|
|                                          |        | summary statistics, or data conversions.                                                                                                                                                                                                                                             |                                 |
|                                          | 13c    | Describe any methods used to tabulate or visually display results of individual studies and syntheses.                                                                                                                                                                               | 7                               |
|                                          | 13d    | Describe any methods used to synthesize results and provide a rationale for the choice(s). If meta-analysis was performed, describe the model(s), method(s) to identify the presence and extent of statistical heterogeneity, and software package(s) used.                          | 5                               |
|                                          | 13e    | Describe any methods used to explore possible causes of heterogeneity among study results (e.g. subgroup analysis, meta-regression).                                                                                                                                                 | 5-7                             |
|                                          | 13f    | Describe any sensitivity analyses conducted to assess robustness of the synthesized results.                                                                                                                                                                                         | 5-6                             |
| Reporting bias assessment                | 14     | Describe any methods used to assess risk of bias due to missing results in a synthesis (arising from reporting biases).                                                                                                                                                              | 6                               |
| Certainty assessment                     | 15     | Describe any methods used to assess certainty (or confidence) in the body of evidence for an outcome.                                                                                                                                                                                | 4                               |
| <b>RESULTS</b>                           |        |                                                                                                                                                                                                                                                                                      |                                 |
| Study selection                          | 16     | Describe the results of the search and selection process, from the number of records identified in the search to the number of studies included in the review, ideally using a flow diagram.                                                                                         | Fig1                            |
| Study characteristics                    | 17     | Cite each included study and present its characteristics.                                                                                                                                                                                                                            | 7, T2, T3                       |
| Risk of bias in studies                  | 18     | Present assessments of risk of bias for each included study.                                                                                                                                                                                                                         | T2, T3                          |
| Results of individual studies            | 19     | For all outcomes, present, for each study: (a) summary statistics for each group (where appropriate) and (b) an effect estimate and its precision (e.g. confidence/credible interval), ideally using structured tables or plots.                                                     | Fig. 2-7                        |
| Results of syntheses                     | 20a    | For each synthesis, briefly summarise the characteristics and risk of bias among contributing studies.                                                                                                                                                                               | Fig. 2-7                        |
| Results of syntheses<br>Reporting biases | 20b    | Present results of all statistical syntheses conducted. If meta-analysis was done, present for each the summary estimate and its precision (e.g. confidence/credible interval) and measures of statistical heterogeneity. If comparing groups, describe the direction of the effect. | Fig. 2-7                        |
|                                          | 20c    | Present results of all investigations of possible causes of heterogeneity among study results.                                                                                                                                                                                       | Fig.8                           |
|                                          | 20d    | Present results of all sensitivity analyses conducted to assess the robustness of the synthesized results.                                                                                                                                                                           | Fig.8                           |
|                                          | 21     | Present assessments of risk of bias due to missing results (arising from reporting biases) for each synthesis assessed.                                                                                                                                                              | Fig.8                           |
| Certainty of evidence                    | 22     | Present assessments of certainty (or confidence) in the body of evidence for each outcome assessed.                                                                                                                                                                                  | Fig.8                           |
| <b>DISCUSSION</b>                        |        |                                                                                                                                                                                                                                                                                      |                                 |
| Discussion                               | 23a    | Provide a general interpretation of the results in the context of other evidence.                                                                                                                                                                                                    | 11-12                           |
|                                          | 23b    | Discuss any limitations of the evidence included in the review.                                                                                                                                                                                                                      | 12                              |
|                                          | 23c    | Discuss any limitations of the review processes used.                                                                                                                                                                                                                                | 12                              |
|                                          | 23d    | Discuss implications of the results for practice, policy, and future research.                                                                                                                                                                                                       | 13                              |

**Supplemental Table 2: Data items extracted from the included clinical and animal studies.**

| Parameters                                                  | Identified data                                                                                                                                                                                                                                                                                                                                                                                                                                                                  |
|-------------------------------------------------------------|----------------------------------------------------------------------------------------------------------------------------------------------------------------------------------------------------------------------------------------------------------------------------------------------------------------------------------------------------------------------------------------------------------------------------------------------------------------------------------|
| Subject species                                             | Human, mouse                                                                                                                                                                                                                                                                                                                                                                                                                                                                     |
| Study design                                                | Clinical studies: case series, case report, retrospective and cohort<br>Animal studies: in vivo study in mouse model of OI                                                                                                                                                                                                                                                                                                                                                       |
| Diagnostic approach                                         | Clinical assessment, Radiography, Genetic test and Family history                                                                                                                                                                                                                                                                                                                                                                                                                |
| OI type                                                     | I, II, III, IV, V, XII, XIII, XIV, XVI and XX                                                                                                                                                                                                                                                                                                                                                                                                                                    |
| Strain OI mice                                              | <i>Colla1</i> mutation: <i>Colla1</i> <sup>(Jrt/+)</sup> , <i>Brt1</i> <sup>-/-</sup><br><i>Colla2</i> mutation: <i>G610C</i> <sup>+/-</sup> , <i>Oim</i> <sup>-/-</sup> , <i>Oim</i> <sup>+/-</sup><br><i>Wnt1</i> mutation: <i>Wnt1</i> <sup>+G177C</sup> , <i>Wnt1</i> <sup>G177C/G177C</sup> , <i>Wnt1</i> <sup>prrx1-/-</sup> , <i>Wnt1</i> <sup>sw/sw</sup><br>Other: <i>Bril</i> <sup>-/-</sup> , <i>Crtap</i> <sup>-/-</sup>                                             |
| Age                                                         | Clinical studies: weeks, months, years<br>Animal studies: weeks                                                                                                                                                                                                                                                                                                                                                                                                                  |
| Sex                                                         | Male, Female, Male and female combined and Not reported                                                                                                                                                                                                                                                                                                                                                                                                                          |
| Sample size                                                 | Clinical studies: number of patients and controls<br>Animal studies: number of mice/groups                                                                                                                                                                                                                                                                                                                                                                                       |
| Healthy control                                             | Clinical studies: <i>i</i> ) age-matched group (AMG), <i>ii</i> ) reference values were given but the source unknown (reference without source (RWS)), <i>iii</i> ) reference to control is cited, age-matched data extracted (cited age-matched reference (CAR)), <i>iv</i> ) control data was not given or cited, age-matched reference assigned (assigned age-matched reference (AAR)).<br>Animal studies: age-matched littermate control (LC) and age-matched wild-type (WT) |
| Bone resorption markers                                     | Serum markers: CTX1 (ng/mL or pg/mL, or T-score) and NTX (nmolBCE/l)<br>Urinary marker: NTX (nmol BCE/mmol Cr or pmole/umole Cr) and DPD (nM/mM Cr or nmol /mmol Cr or ug/g Cr)                                                                                                                                                                                                                                                                                                  |
| Histomorphometric analysis of osteoclast-related parameters | Number of osteoclast = (N.Oc/BS, N.Oc/B.Per, 1/mm, N.Oc/BA, 1/mm <sup>2</sup> )<br>Osteoclast surface = Oc.S/BS (%)<br>Eroded surface= ES/BS (%)                                                                                                                                                                                                                                                                                                                                 |

Parameters described the characteristics of OI subjects, study design, diagnostic approach, type of OI for patients or OI mouse model for animal studies, age, sex, sample size, type of control group, the included bone resorption markers and osteoclast-related parameters from histomorphometric analysis.

**Supplemental Table 3: Extraction table**

| Clinical studies of collagen degradation markers |        |                           |               |     |         |     |       |       |                         |     |           |     |       |       |
|--------------------------------------------------|--------|---------------------------|---------------|-----|---------|-----|-------|-------|-------------------------|-----|-----------|-----|-------|-------|
| Author, year                                     | Marker | Method                    | OI subjects   |     |         |     |       |       | Heathy control subjects |     |           |     |       |       |
|                                                  |        |                           | OI type       | Sex | Age (y) | N   | Mean  | SD    | Reference               | Sex | Age (y)   | N   | Mean  | SD    |
| D'Eufemia 2014                                   | sCTX   | Chemiluminescence (ng/ml) | I             | MF  | 2 - 6   | 18  | 6.50  | 4.50  | Rauchenzauner 2007      | MF  | 2.5 - 7.5 | 150 | 1.64  | 0.67  |
| D'Eufemia 2017                                   | sCTX   | Chemiluminescence (ng/ml) | I             | MF  | 4 - 5   | 12  | 5.22  | 3.40  | Rauchenzauner 2007      | MF  | 2.5 - 7.5 | 150 | 1.64  | 0.67  |
| D'Eufemia 2017                                   | sCTX   | Chemiluminescence (ng/ml) | I             | MF  | 4 - 5   | 6   | 9.02  | 5.00  | Rauchenzauner 2007      | MF  | 2.5 - 7.5 | 150 | 1.64  | 0.67  |
| Xu 2019                                          | sCTX   | Chemiluminescence (ng/ml) | XIII          | M   | 15.7    | 1   | 0.97  | 1.84  | AMG                     | NR  | NR        | 3   | 0.33  | 0.06  |
| Zhang 2022                                       | sCTX   | Chemiluminescence (ng/ml) | I, III, IV, V | MF  | 14.3    | 127 | 0.65  | 0.42  | AMR                     | MF  | 7 - 15    | 3   | 0.39  | 0.25  |
| Zhang 2022                                       | sCTX   | Chemiluminescence (ng/ml) | I, III, IV, V | MF  | 38.3    | 22  | 0.13  | 0.07  | AMR                     | MF  | 27 - 46   | 3   | 0.33  | 0.24  |
| Hryhorovskiy 2015                                | sCTX   | Chemiluminescence (ng/ml) | I             | NR  | 5 - 17  | 1   | 0.69  | 1.84  | AMG                     | NR  | NR        | 21  | 0.57  | 1.31  |
| Hryhorovskiy 2015                                | sCTX   | Chemiluminescence (ng/ml) | III           | NR  | 5 - 17  | 3   | 0.87  | 0.16  | AMG                     | NR  | NR        | 21  | 0.57  | 1.31  |
| Kitaoka 2011                                     | sNTX   | ELISA (nmolBCE/l)         | I             | M   | 7       | 1   | 50.50 | 29.12 | van der Sluis 2002      | M   | 7.7       | 2   | 41.91 | 10.12 |
| Kitaoka 2011                                     | sNTX   | ELISA (nmolBCE/l)         | I             | M   | 4       | 1   | 59.00 | 29.12 | van der Sluis 2002      | M   | 8.21      | 6   | 56.05 | 24.77 |
| Kitaoka 2011                                     | sNTX   | ELISA (nmolBCE/l)         | I             | F   | 10      | 1   | 76.50 | 29.12 | van der Sluis 2002      | F   | 10.3      | 5   | 64.87 | 21.17 |
| Kitaoka 2011                                     | sNTX   | ELISA (nmolBCE/l)         | I             | M   | 12      | 1   | 79.00 | 29.12 | van der Sluis 2002      | M   | 12.08     | 4   | 58.89 | 12.93 |
| Kitaoka 2011                                     | sNTX   | ELISA (nmolBCE/l)         | I             | F   | 4       | 1   | 47.20 | 29.12 | van der Sluis 2002      | F   | 8.29      | 6   | 53.34 | 12.96 |
| Kitaoka 2011                                     | sNTX   | ELISA (nmolBCE/l)         | I             | M   | 4       | 1   | 38.00 | 29.12 | van der Sluis 2002      | M   | 8.21      | 6   | 56.05 | 24.77 |
| Kitaoka 2011                                     | sNTX   | ELISA (nmolBCE/l)         | I             | F   | 4       | 1   | 58.50 | 29.12 | van der Sluis 2002      | F   | 8.29      | 6   | 53.34 | 12.96 |
| Kitaoka 2011                                     | sNTX   | ELISA (nmolBCE/l)         | I             | M   | 14      | 1   | 80.00 | 29.12 | van der Sluis 2002      | M   | 14.56     | 4   | 110.9 | 30.66 |
| Kitaoka 2011                                     | sNTX   | ELISA (nmolBCE/l)         | I             | F   | 13      | 1   | 36.60 | 29.12 | van der Sluis 2002      | F   | 13.33     | 2   | 38.23 | 5.72  |
| Kitaoka 2011                                     | sNTX   | ELISA (nmolBCE/l)         | I             | M   | 1       | 1   | 66.60 | 29.12 | van der Sluis 2002      | M   | 8.21      | 6   | 56.05 | 24.77 |
| Kitaoka 2011                                     | sNTX   | ELISA (nmolBCE/l)         | IV            | F   | 1       | 1   | 47.80 | 29.12 | van der Sluis 2002      | F   | 8.29      | 6   | 53.34 | 12.96 |
| Kitaoka 2011                                     | sNTX   | ELISA (nmolBCE/l)         | IV            | M   | 6       | 1   | 46.50 | 29.12 | van der Sluis 2002      | M   | 7.73      | 2   | 41.91 | 10.12 |
| Kitaoka 2011                                     | sNTX   | ELISA (nmolBCE/l)         | IV            | F   | 0       | 1   | 92.00 | 29.12 | van der Sluis 2002      | F   | 8.29      | 6   | 53.34 | 12.96 |
| Hoyer-Kuhn 2016                                  | sNTX   | ELISA (nmolBCE/l)         | I, IV         | MF  | 5 - 11  | 10  | 85.48 | 39.56 | van der Sluis 2002      | MF  | 7 - 11    | 40  | 59.45 | 17.86 |
| Hoyer-Kuhn 2016                                  | uDPD   | HPLC (nmol/mmol Cr)       | I, IV         | MF  | 5 - 11  | 1   | 43.52 | 31.76 | Shaw 1995               | MF  | 5 - 11    | 81  | 38.87 | 25.02 |

| Clinical studies of collagen degradation markers (continue) |        |                      |             |     |         |    |                 |       |                         |     |         |     |       |       |
|-------------------------------------------------------------|--------|----------------------|-------------|-----|---------|----|-----------------|-------|-------------------------|-----|---------|-----|-------|-------|
| Author, year                                                | Marker | Method               | OI subjects |     |         |    |                 |       | Heathy control subjects |     |         |     |       |       |
|                                                             |        |                      | OI type     | Sex | Age (y) | N  | Mean            | SD    | Reference               | Sex | Age (y) | N   | Mean  | SD    |
| Hoyer-Kuhn 2016                                             | uDPD   | HPLC (nmol/mmol Cr)  | I, IV       | MF  | 5 - 11  | 1  | 104.0           | 31.76 | Shaw 1995               | MF  | 5 - 11  | 81  | 38.87 | 25.02 |
| Hoyer-Kuhn 2016                                             | uDPD   | HPLC (nmol/mmol Cr)  | I, IV       | MF  | 5 - 11  | 1  | 105.4           | 31.76 | Shaw 1995               | MF  | 5 - 11  | 81  | 38.87 | 25.02 |
| Hoyer-Kuhn 2016                                             | uDPD   | HPLC (nmol/mmol Cr)  | I, IV       | MF  | 5 - 11  | 1  | 122.4           | 31.76 | Shaw 1995               | MF  | 5 - 11  | 81  | 38.87 | 25.02 |
| Hoyer-Kuhn 2016                                             | uDPD   | HPLC (nmol/mmol Cr)  | I, IV       | MF  | 5 - 11  | 1  | 160.1           | 31.76 | Shaw 1995               | MF  | 5 - 11  | 81  | 38.87 | 25.02 |
| Hoyer-Kuhn 2016                                             | uDPD   | HPLC (nmol/mmol Cr)  | I, IV       | MF  | 5 - 11  | 1  | 170.9           | 31.76 | Shaw 1995               | MF  | 5 - 11  | 81  | 38.87 | 25.02 |
| Hoyer-Kuhn 2016                                             | uDPD   | HPLC (nmol/mmol Cr)  | I, IV       | MF  | 5 - 11  | 1  | 187.0           | 31.76 | Shaw 1995               | MF  | 5 - 11  | 81  | 38.87 | 25.02 |
| Hoyer-Kuhn 2016                                             | uDPD   | HPLC (nmol/mmol Cr)  | I, IV       | MF  | 5 - 11  | 1  | 193.8           | 31.76 | Shaw 1995               | MF  | 5 - 11  | 81  | 38.87 | 25.02 |
| Hoyer-Kuhn 2016                                             | uDPD   | HPLC (nmol/mmol Cr)  | I, IV       | MF  | 5 - 11  | 1  | 211.3           | 31.76 | Shaw 1995               | MF  | 5 - 11  | 81  | 38.87 | 25.02 |
| Hoyer-Kuhn 2016                                             | uDPD   | HPLC (nmol/mmol Cr)  | I, III      | MF  | 5 - 11  | 10 | 48.33           | 17.97 | Shaw 1995               | MF  | 8 - 9   | 17  | 40.79 | 14.64 |
| Zacharin 2004                                               | uDPD   | HPLC (nmol/mmol Cr)  | mild        | NA  | 2 - 15  | 18 | 26.70           | 13.50 | Shaw 1995               | MF  | 2 - 15  | 110 | 38.88 | 27.61 |
| Iwamoto 2002                                                | uDPD   | HPLC (nmol/mmol Cr)  | I           | M   | 58      | 1  | 7.40            | 31.76 | Chan 2004               | M   | 68 ± 7  | 46  | 4.85  | 0.79  |
| Asharani 2012                                               | uDPD   | NR (nmol/mmol Cr)    | XIII        | NA  | 5       | 1  | 58.66           | 31.76 | AMR                     | NR  | NR      | 3   | 16.50 | 5.00  |
| Asharani 2012                                               | uDPD   | NR (nmol/mmol Cr)    | XIII        | NA  | 1.9     | 1  | 63.90           | 31.76 | AMR                     | NR  | NR      | 3   | 19.50 | 7.20  |
| Zacharin 2002                                               | uDPD   | HPLC (nmol/mmol Cr)  | NR          | MF  | 1 - 14  | 18 | 66.20           | 6.70  | Shaw 1995               | MF  | 2 - 15  | 115 | 38.20 | 27.42 |
| Uehara 2017                                                 | uNTX   | ELISA (nmol/mmol Cr) | I           | F   | 42      | 1  | 19.30           | 10.25 | Sone 1995               | F   | 40 - 49 | 43  | 26.20 | 10.30 |
| Uehara 2017                                                 | uNTX   | ELISA (nmol/mmol Cr) | I           | F   | 40      | 1  | 24.40           | 10.25 | Sone 1995               | F   | 40 - 49 | 43  | 26.20 | 10.30 |
| Uehara 2017                                                 | uNTX   | ELISA (nmol/mmol Cr) | I           | F   | 14      | 1  | 32.90           | 10.25 | Sone 1995               | F   | 20 - 29 | 30  | 37.50 | 11.10 |
| Iwamoto 2002                                                | uNTX   | ELISA(nmol/mmol Cr)  | I           | M   | 58      | 1  | 42.70           | 10.25 | Sone 1995               | M   | 40 - 49 | 43  | 26.20 | 10.30 |
| Pressac 2002                                                | uCTX   | ELISA                | I, III, IV  | MF  | 1 - 4   | 1  | T-score = -2.22 |       | AMR                     | MF  | 4 - 10  |     |       |       |
| Pressac 2002                                                | uCTX   | ELISA                | I, III, IV  | MF  | 1 - 4   | 1  | T-score = -1.47 |       | AMR                     | MF  | 4 - 10  |     |       |       |
| Pressac 2002                                                | uCTX   | ELISA                | I, III, IV  | MF  | 1 - 4   | 1  | T-score = -0.99 |       | AMR                     | MF  | 4 - 10  |     |       |       |
| Pressac 2002                                                | uCTX   | ELISA                | I, III, IV  | MF  | 1 - 4   | 1  | T-score = -0.56 |       | AMR                     | MF  | 4 - 10  |     |       |       |
| Pressac 2002                                                | uCTX   | ELISA                | I, III, IV  | MF  | 1 - 4   | 1  | T-score = 0.42  |       | AMR                     | MF  | 4 - 10  |     |       |       |

| Clinical studies of collagen degradation markers (continue) |        |                   |             |                     |         |         |      |                |                         |                     |        |         |    |       |       |
|-------------------------------------------------------------|--------|-------------------|-------------|---------------------|---------|---------|------|----------------|-------------------------|---------------------|--------|---------|----|-------|-------|
| Author, year                                                | Marker | Method            | OI subjects |                     |         |         |      |                | Heathy control subjects |                     |        |         |    |       |       |
|                                                             |        |                   | OI type     | Sex                 | Age (y) | N       | Mean | Reference      | Sex                     | Age (y)             | N      | Mean    | SD |       |       |
| Pressac 2002                                                | uCTX   | ELISA             | I, III, IV  | MF                  | 1 - 4   | 1       |      | T-score =3.79  | AMR                     | MF                  | 4 - 10 |         |    |       |       |
| Pressac 2002                                                | uCTX   | ELISA             | I, III, IV  | MF                  | 1 - 4   | 1       |      | T-score = 5.21 | AMR                     | MF                  | 4 - 10 |         |    |       |       |
| Animal studies of collagen degradation markers              |        |                   |             |                     |         |         |      |                |                         |                     |        |         |    |       |       |
| Author, year                                                | Marker | Method            | Unit        | OI mice             |         |         |      |                |                         | Heathy control mice |        |         |    |       |       |
|                                                             |        |                   |             | Genotype            | Sex     | Age (d) | N    | Mean           | SD                      | Control mice        | Sex    | Age (d) | N  | Mean  | SD    |
| Kalajic 2002                                                | uDPD   | PYRILINKS-D assay | nM/mM Cr    | Oim <sup>-/-</sup>  | NR      | 30      | 7    | 33.51          | 4.28                    | WT                  | NR     | 30      | 3  | 23.28 | 2.06  |
| Kalajic 2002                                                | uDPD   | PYRILINKS-D assay | nM/mM Cr    | Oim <sup>+/-</sup>  | NR      | 30      | 5    | 24.20          | 2.83                    | WT                  | NR     | 30      | 3  | 23.28 | 2.06  |
| Kalajic 2002                                                | uDPD   | PYRILINKS-D assay | nM/mM Cr    | Oim <sup>-/-</sup>  | NR      | 90      | 8    | 16.38          | 4.80                    | WT                  | NR     | 90      | 12 | 10.78 | 2.66  |
| Kalajic 2002                                                | uDPD   | PYRILINKS-D assay | nM/mM Cr    | Oim <sup>+/-</sup>  | NR      | 90      | 15   | 11.44          | 1.97                    | WT                  | NR     | 90      | 12 | 10.78 | 2.66  |
| Kalajic 2002                                                | uDPD   | PYRILINKS-D assay | nM/mM Cr    | Oim <sup>-/-</sup>  | NR      | 150     | 4    | 16.47          | 3.85                    | WT                  | NR     | 150     | 7  | 10.78 | 1.37  |
| Kalajic 2002                                                | uDPD   | PYRILINKS-D assay | nM/mM Cr    | Oim <sup>+/-</sup>  | NR      | 150     | 7    | 9.98           | 1.20                    | WT                  | NR     | 150     | 7  | 10.78 | 1.37  |
| Chen 2014                                                   | sCTX   | ELISA             | ng/mL       | Coll1a1<br>(Jrt/+)  | NR      | 35      | 4    | 96.80          | 27.10                   | WT littermate       | NR     | 35      | 4  | 43.90 | 17.90 |
| Chen 2014                                                   | sCTX   | ELISA             | ng/mL       | Coll1a1<br>(Jrt/+)  | NR      | 35      | 4    | 12.45          | 3.20                    | WT littermate       | NR     | 35      | 4  | 8.90  | 1.30  |
| Zimmerman 2018                                              | sCTX   | ELISA             | ng/ml       | Oim <sup>-/-</sup>  | NR      | 90      | 6    | 516.2<br>0     | 171.1<br>0              | WT littermate       | NR     | 90      | 6  | 14.25 | 2.72  |
| Oestreich 2016                                              | sCTX   | ELISA             | ng/ml       | Oim <sup>+/-</sup>  | NR      | 120     | 15   | 124.6<br>6     | 37.14                   | WT littermate       | NR     | 120     | 13 | 20.60 | 39.70 |
| Patoine 2017                                                | sCTX   | ELISA             | ng/ml       | Bril <sup>-/-</sup> | M       | 42      | 4    | 42.58          | 6.36                    | WT littermate       | M      | 42      | 4  | 47.89 | 10.96 |
| Patoine 2017                                                | sCTX   | ELISA             | ng/ml       | Bril <sup>-/-</sup> | M       | 90      | 4    | 33.74          | 4.29                    | WT littermate       | M      | 90      | 4  | 26.95 | 5.21  |
| Jeong 2018                                                  | sCTX   | ELISA             | ng/ml       | Colla2<br>(+/G610C) | M       | 120     | 7    | 10.54          | 2.51                    | WT littermate       | M      | 120     | 9  | 17.70 | 10.05 |
| Jeong 2018                                                  | sCTX   | ELISA             | ng/ml       | Oim <sup>-/-</sup>  | M       | 120     | 9    | 197.9<br>4     | 77.82                   | WT littermate       | M      | 120     | 9  | 17.70 | 10.05 |
| Jeong 2018                                                  | sCTX   | ELISA             | ng/ml       | Colla2<br>(+/G610C) | F       | 120     | 9    | 11.01          | 5.65                    | WT littermate       | F      | 120     | 9  | 12.52 | 3.14  |
| Jeong 2018                                                  | sCTX   | ELISA             | ng/ml       | Oim <sup>-/-</sup>  | F       | 120     | 9    | 168.2<br>8     | 66.53                   | WT littermate       | F      | 120     | 9  | 12.52 | 3.14  |

| Animal studies of collagen degradation markers (continue) |        |        |              |                      |     |         |    |        |        |                     |     |         |    |       |       |
|-----------------------------------------------------------|--------|--------|--------------|----------------------|-----|---------|----|--------|--------|---------------------|-----|---------|----|-------|-------|
| Author, year                                              | Marker | Method | Unit         | OI mice              |     |         |    |        |        | Heathy control mice |     |         |    |       |       |
|                                                           |        |        |              | Genotype             | Sex | Age (d) | N  | Mean   | SD     | Control mice        | Sex | Age (d) | N  | Mean  | SD    |
| Matthews 2017                                             | sCTX   | ELISA  | ng/ml        | Oim <sup>-/-</sup>   | M   | 63      | 8  | 875.88 | 181.42 | WT littermate       | M   | 63      | 8  | 13.02 | 11.06 |
| Boraschi-Diaz 2017                                        | sCTX   | ELISA  | ng/ml        | Coll1a1 (Jrt/+)      | M   | 28      | 6  | 154.70 | 35.40  | WT littermate       | M   | 28      | 6  | 36.86 | 6.32  |
| Boraschi-Diaz 2017                                        | sCTX   | ELISA  | ng/ml        | Coll1a1 (Jrt/+)      | F   | 28      | 6  | 70.49  | 21.48  | WT littermate       | F   | 28      | 6  | 14.07 | 2.52  |
| Boraschi-Diaz 2017                                        | sCTX   | ELISA  | ng/ml        | Coll1a1 (Jrt/+)      | M   | 56      | 8  | 21.39  | 10.21  | WT littermate       | M   | 56      | 8  | 10.38 | 2.94  |
| Boraschi-Diaz 2017                                        | sCTX   | ELISA  | ng/ml        | Coll1a1 (Jrt/+)      | F   | 56      | 8  | 31.64  | 10.21  | WT littermate       | F   | 56      | 8  | 12.89 | 2.91  |
| Boraschi-Diaz 2017                                        | sCTX   | ELISA  | ng/ml        | Coll1a1 (Jrt/+)      | M   | 98      | 4  | 19.19  | 9.28   | WT littermate       | M   | 98      | 4  | 11.28 | 2.06  |
| Boraschi-Diaz 2017                                        | sCTX   | ELISA  | ng/ml        | Coll1a1 (Jrt/+)      | F   | 98      | 4  | 16.53  | 4.12   | WT littermate       | F   | 98      | 4  | 10.69 | 2.06  |
| Vollersen 2021                                            | sCTX   | ELISA  | pg/ml        | Wnt1 +/G177C         | F   | 84      | 5  | 33.55  | 14.86  | WT littermate       | F   | 84      | 5  | 25.05 | 11.78 |
| Vollersen 2021                                            | sCTX   | ELISA  | pg/ml        | Wnt1 G177C/G177C     | F   | 84      | 5  | 24.86  | 7.01   | WT littermate       | F   | 84      | 5  | 25.05 | 11.78 |
| Vollersen 2021                                            | sCTX   | ELISA  | pg/ml        | Wnt1 +/G177C         | M   | 84      | 4  | 21.50  | 7.57   | WT littermate       | M   | 84      | 4  | 17.57 | 5.70  |
| Vollersen 2021                                            | sCTX   | ELISA  | pg/ml        | Wnt1 G177C/G177C     | M   | 84      | 4  | 27.20  | 7.94   | WT littermate       | M   | 84      | 4  | 17.57 | 5.70  |
| Grafe 2014                                                | sCTX   | ELISA  | ng/ml        | Crtap <sup>-/-</sup> | F   | 56      | 14 | 34.19  | 5.96   | WT littermate       | F   | 56      | 8  | 25.58 | 3.81  |
| Grafe 2014                                                | sCTX   | ELISA  | ng/ml        | Crtap <sup>-/-</sup> | F   | 112     | 7  | 20.82  | 3.22   | WT littermate       | F   | 112     | 8  | 14.83 | 2.97  |
| Greene 2021                                               | sCTX   | ELISA  | ng/ml        | Colla2 (+/G610C)     | F   | 140     | 10 | 16.78  | 11.90  | WT littermate       | F   | 140     | 10 | 13.77 | 7.14  |
| Uveges 2008                                               | uDPD   | ELISA  | nmol/mmol Cr | Brtl <sup>-/-</sup>  | M   | 60      | 7  | 6.94   | 1.16   | WT littermate       | M   | 60      | 8  | 7.31  | 0.98  |
| Uveges 2008                                               | uDPD   | ELISA  | nmol/mmol Cr | Brtl <sup>-/-</sup>  | M   | 180     | 8  | 3.71   | 0.53   | WT littermate       | M   | 180     | 7  | 3.20  | 0.49  |



| Clinical studies of osteoclast-related parameter from bone histomorphometric analysis |     |            |                |        |         |             |       |        |                          |    |       |       |
|---------------------------------------------------------------------------------------|-----|------------|----------------|--------|---------|-------------|-------|--------|--------------------------|----|-------|-------|
| Author, year                                                                          | Sex | Type of OI | Parameters     | Unit   | Age (Y) | OI subjects |       |        | Healthy control subjects |    |       |       |
|                                                                                       |     |            |                |        |         | N           | Mean  | SD     | Reference                | N  | Mean  | SD    |
| Baron 1983                                                                            | MF  | NR         | OcS/BS         | %      | 10      | 9           | 2.00  | 1.10   | AMG                      | 5  | 1.10  | 0.30  |
| Baron 1983                                                                            | MF  | NR         | N.Oc/perimeter | no./mm | 10      | 9           | 0.30  | 0.16   | AMG                      | 5  | 0.12  | 0.02  |
| Hryhorovskiy 2015                                                                     | NR  | I          | N.Oc/perimeter | no./mm | 11      | 3           | 3.41  | 1.53   | Glorieux 2000            | 58 | 0.32  | 0.17  |
| Hryhorovskiy 2015                                                                     | NR  | III        | N.Oc/perimeter | no./mm | 11      | 3           | 2.94  | 2.39   | Glorieux 2000            | 58 | 0.32  | 0.17  |
| Iwamoto 2002                                                                          | M   | I          | N.Oc/BS        | no./mm | 58      | 1           | 0.22  |        | Recker 2018              | 48 | 0.19  | 0.13  |
| Iwamoto 2002                                                                          | M   | I          | Oc.S/BS        | %      | 58      | 1           | 0.69  |        | Recker 2018              | 48 | 0.34  | 0.24  |
| Iwamoto 2002                                                                          | M   | I          | ES/BS          | %      | 58      | 1           | 6.50  |        | Recker 2018              | 48 | 1.16  | 0.63  |
| Leanne Ward 2016                                                                      | M   | VI         | N.Oc/perimeter | no./mm | 0.71    | 1           | 0.10  |        | Glorieux 2000            | 58 | 0.40  | 0.20  |
| Leanne Ward 2016                                                                      | M   | VI         | OcS/BS         | %      | 0.71    | 1           | 0.04  |        | Glorieux 2000            | 58 | 1.10  | 0.80  |
| Lui 2022                                                                              | M   | XII        | ES/BS          | %      | 6       | 1           | 32.15 |        | Glorieux 2000            | 58 | 14.80 | 4.40  |
| Lui 2022                                                                              | M   | XII        | Oc.S/BS        | %      | 6       | 1           | 3.36  |        | Glorieux 2000            | 58 | 1.10  | 0.75  |
| Rauch 2000                                                                            | MF  | I          | ES/BS          | %      | 7.6     | 32          | 17.03 | 6.27   | Glorieux 2000            | 27 | 15.33 | 5.06  |
| Rauch 2000                                                                            | MF  | I          | Oc.S/BS        | %      | 7.6     | 32          | 1.37  | 0.50   | Glorieux 2001            | 27 | 1.20  | 0.87  |
| Rauch 2000                                                                            | MF  | I          | N.Oc/BS        | no./mm | 7.6     | 32          | 0.47  | 0.29   | Glorieux 2002            | 27 | 0.35  | 0.18  |
| Rauch 2000                                                                            | MF  | III        | ES/BS          | %      | 7.6     | 11          | 15.83 | -18.16 | Glorieux 2003            | 27 | 19.57 | 14.95 |
| Rauch 2000                                                                            | MF  | III        | Oc.S/BS        | %      | 7.9     | 11          | 2.02  | 1.41   | Glorieux 2004            | 27 | 1.20  | 0.87  |
| Rauch 2000                                                                            | MF  | III        | N.Oc/BS        | no./mm | 7.9     | 11          | 0.69  | 0.36   | Glorieux 2005            | 27 | 0.35  | 0.18  |
| Rauch 2000                                                                            | MF  | IV         | ES/BS          | %      | 7.5     | 27          | 20.37 | 8.88   | Glorieux 2006            | 27 | 15.33 | 5.06  |
| Rauch 2000                                                                            | MF  | IV         | Oc.S/BS        | %      | 7.5     | 27          | 1.79  | 1.20   | Glorieux 2007            | 27 | 1.20  | 0.87  |
| Rauch 2000                                                                            | MF  | IV         | N.Oc/BS        | no./mm | 7.5     | 27          | 0.51  | 0.29   | Glorieux 2008            | 27 | 0.35  | 0.18  |
| Rauch 2002                                                                            | MF  | I, III, IV | OcS/BS         | %      | 8.4     | 41          | 1.18  | 2.30   | Glorieux 2009            | 58 | 0.32  | 0.17  |
| Rauch 2002                                                                            | MF  | I, III, IV | ES/BS          | %      | 8.4     | 44          | 19.00 | 1.80   | Glorieux 2010            | 58 | 1.09  | 0.58  |
| Ste-Marie 1984 AGD chli                                                               | M   | NR         | ES/BS          | %      | 12      | 4           | 5.70  | 2.50   | Glorieux 2000            | 12 | 7.60  | 1.70  |

| Clinical studies of osteoclast-related parameter from bone histomorphometric analysis (continue) |     |                       |            |                     |         |             |      |      |                         |    |       |      |
|--------------------------------------------------------------------------------------------------|-----|-----------------------|------------|---------------------|---------|-------------|------|------|-------------------------|----|-------|------|
| Author, year                                                                                     | Sex | Type of OI            | Parameters | Unit                | Age (Y) | OI subjects |      |      | Heathy control subjects |    |       |      |
|                                                                                                  |     |                       |            |                     |         | N           | Mean | SD   | Reference               | N  | Mean  | SD   |
| Ste-Marie 1984 AGD F                                                                             | F   | NR                    | N.Oc/mm2   | no./mm <sup>2</sup> | 41      | 4           | 0.41 | 0.15 | Glorieux 2001           | 3  | 0.20  | 0.09 |
| Ste-Marie 1984 AGD F                                                                             | F   | NR                    | ES/BS      | %                   | 41      | 4           | 6.33 | 3.09 | Glorieux 2002           | 3  | 3.60  | 1.10 |
| Ste-Marie 1984 AGD M                                                                             | M   | NR                    | N.Oc/mm2   | no./mm <sup>2</sup> | 42.3    | 4           | 0.21 | 0.12 | Glorieux 2003           | 3  | 0.20  | 0.09 |
| Ste-Marie 1984 AGD M                                                                             | M   | NR                    | ES/BS      | %                   | 42.3    | 4           | 4.60 | 2.82 | Glorieux 2004           | 3  | 3.60  | 1.10 |
| Ste-Marie 1984 chli                                                                              | M   | NR                    | N.Oc/mm2   | no./mm <sup>2</sup> | 12      | 4           | 0.45 | 0.32 | Glorieux 2005           | 12 | 0.80  | 0.43 |
| Stürznickel 2021                                                                                 | NR  | XX                    | ES/BS      | %                   | 0.46    | 1           | 4.61 | 7.71 | AMG                     | 58 | 1.10  | 0.80 |
| Stürznickel 2021                                                                                 | NR  | XX                    | N.Oc/B.Pm  | no./mm              | 0.46    | 1           | 0.78 | 0.55 | AMG                     | 58 | 0.40  | 0.20 |
| Surowieca 2020                                                                                   | MF  | I, III, IV,<br>III/IV | N.Oc/B.Pm  | no./mm              | 11.7    | 8           | 1.04 | 0.97 | Glorieux 2000           | 58 | 0.32  | 0.17 |
| Webb 2017                                                                                        | M   | XIV                   | ES/BS      | %                   | 15      | 1           | 2.94 |      | AMG                     | 14 | 14.90 | 5.60 |
| Webb 2017                                                                                        | F   | XIV                   | ES/BS      | %                   | 24      | 1           | 1.55 |      | AMG                     | 14 | 14.90 | 5.60 |
| Webb 2017                                                                                        | M   | XIV                   | Oc.S/BS    | %                   | 15      | 1           | 0.15 |      | AMG                     | 14 | 1.14  | 0.74 |
| Webb 2017                                                                                        | F   | XIV                   | Oc.S/BS    | %                   | 24      | 1           | 0.10 |      | AMG                     | 14 | 1.14  | 0.74 |
| Webb 2017                                                                                        | M   | XIV                   | N.Oc/BS    | no./mm              | 15      | 1           | 0.04 |      | AMG                     | 14 | 0.29  | 0.14 |
| Webb 2017                                                                                        | F   | XIV                   | Oc.S/BS    | no./mm              | 24      | 1           | 0.03 |      | AMG                     | 14 | 0.29  | 0.14 |

| Animal studies of osteoclast-related parameter from bone histomorphometric analysis |        |                             |            |       |          |       |         |        |       |                      |        |       |
|-------------------------------------------------------------------------------------|--------|-----------------------------|------------|-------|----------|-------|---------|--------|-------|----------------------|--------|-------|
| Author, year                                                                        | Gender | Genotype                    | Parameters | Organ | Age (wk) | Unit  | OI mice |        |       | Healthy control mice |        |       |
|                                                                                     |        |                             |            |       |          |       | N       | Mean   | SD    | N                    | Mean   | SD    |
| Uveges 2008                                                                         | M      | Brtl <sup>-/-</sup>         | N.Oc       | F     | 8        | n/um2 | 8       | 6.80   | 1.03  | 11                   | 4.68   | 1.20  |
| Uveges 2008                                                                         | M      | Brtl <sup>-/-</sup>         | N.Oc       | F     | 24       | n/um2 | 9       | 6.37   | 1.42  | 13                   | 4.50   | 1.58  |
| Uveges 2008                                                                         | M      | Brtl <sup>-/-</sup>         | N.Oc       | F     | 8        |       | 4       | 215.18 | 26.07 | 4                    | 137.31 | 20.16 |
| Uveges 2008                                                                         | M      | Brtl <sup>-/-</sup>         | N.Oc       | F     | 24       |       | 6       | 64.66  | 5.56  | 6                    | 44.84  | 5.56  |
| Uveges 2008                                                                         | M      | Brtl <sup>-/-</sup>         | Oc.S/BS    | F     | 8        | %     | 8       | 14.69  | 2.85  | 11                   | 10.77  | 3.12  |
| Uveges 2008                                                                         | M      | Brtl <sup>-/-</sup>         | Oc.S/BS    | F     | 24       | %     | 9       | 12.30  | 3.09  | 13                   | 8.48   | 2.49  |
| Uveges 2008                                                                         | NR     | Crtap <sup>-/-</sup>        | N.Oc       | F     | 12       | no/mm | 6       | 10.40  | 2.55  | 6                    | 11.75  | 2.60  |
| Uveges 2008                                                                         | NR     | Crtap <sup>-/-</sup>        | Oc.S/BS    | F     | 12       | %     | 6       | 21.83  | 6.06  | 6                    | 18.08  | 3.85  |
| Chen 2014                                                                           | M      | Col1a1 <sup>(Jrt/+)</sup>   | N.Oc       | F     | 8        | no/mm | 6       | 0.94   | 0.01  | 6                    | 0.95   | 0.02  |
| Joeng 2014                                                                          | NR     | Wnt1 <sup>sw/sw</sup>       | N.Oc       | LV    | 6        | no/mm | 5       | 6.85   | 1.14  | 5                    | 5.27   | 1.00  |
| Joeng 2014                                                                          | NR     | Wnt1 <sup>sw/sw</sup>       | Oc.S/BS    | LV    | 6        | %     | 5       | 12.89  | 2.65  | 5                    | 10.20  | 1.23  |
| Chen 2014                                                                           | M      | Col1a1 <sup>(Jrt/+)</sup>   | Oc.S/BS    | F     | 8        | ratio | 6       | 0.05   | 0.01  | 6                    | 0.05   | 0.01  |
| Gruenwald 2014                                                                      | M      | Sc65 <sup>-/-</sup>         | Oc.S/BS    | T     | 10       | %     | 6       | 0.75   | 1.26  | 6                    | 1.06   | 1.34  |
| Grafe 2014                                                                          | F      | Crtap <sup>-/-</sup>        | N.Oc       | LV    | 16       | no/mm | 6       | 4.83   | 0.87  | 6                    | 3.23   | 0.82  |
| Grafe 2015                                                                          | F      | Crtap <sup>-/-</sup>        | N.Oc       | LV    | 7        | N/BS  | 6       | 4.93   | 0.48  | 6                    | 3.85   | 0.44  |
| Grafe 2015                                                                          | F      | Crtap <sup>-/-</sup>        | N.Oc       | LV    | 12       | N/BS  | 6       | 9.65   | 3.55  | 6                    | 6.09   | 0.60  |
| Grafe 2015                                                                          | F      | Crtap <sup>-/-</sup>        | Oc.S/BS    | LV    | 7        | %     | 6       | 18.87  | 1.62  | 6                    | 15.97  | 2.88  |
| Grafe 2015                                                                          | F      | Crtap <sup>-/-</sup>        | Oc.S/BS    | LV    | 12       | %     | 6       | 29.80  | 5.04  | 6                    | 23.47  | 1.56  |
| Patoine 2017                                                                        | M      | Bril <sup>-/-</sup>         | N.Oc       | F     | 9        | no/mm | 4       | 3.25   | 1.02  | 4                    | 3.03   | 0.52  |
| Patoine 2017                                                                        | M      | Bril <sup>-/-</sup>         | Oc.S/BS    | F     | 9        | %     | 4       | 7.55   | 2.48  | 4                    | 6.80   | 1.56  |
| Patoine 2017                                                                        | M      | Bril <sup>-/-</sup>         | ES/BS      | F     | 9        | %     | 4       | 36.80  | 4.40  | 4                    | 28.50  | 7.20  |
| Jeong 2018                                                                          | M      | Col1a2 <sup>(+/G610C)</sup> | N.Oc       | F     | 16       | no/mm | 4       | 4.09   | 1.65  | 6                    | 2.58   | 0.81  |

| Animal studies of osteoclast-related parameter from bone histomorphometric analysis (continue) |        |                               |            |       |          |       |         |       |      |                      |       |      |
|------------------------------------------------------------------------------------------------|--------|-------------------------------|------------|-------|----------|-------|---------|-------|------|----------------------|-------|------|
| Author, year                                                                                   | Gender | Genotype                      | Parameters | Organ | Age (wk) | Unit  | OI mice |       |      | Healthy control mice |       |      |
|                                                                                                |        |                               |            |       |          |       | N       | Mean  | SD   | N                    | Mean  | SD   |
| Jeong 2018                                                                                     | F      | Col1a2 (+/G610C)              | N.Oc       | F     | 16       | no/mm | 4       | 5.47  | 1.02 | 7                    | 5.53  | 1.26 |
| Jeong 2018                                                                                     | M      | Col1a2 (+/G610C)              | Oc.S/BS    | F     | 16       | %     | 4       | 9.21  | 3.31 | 6                    | 6.98  | 2.27 |
| Jeong 2018                                                                                     | F      | Col1a2 (+/G610C)              | Oc.S/BS    | F     | 16       | %     | 4       | 13.06 | 2.44 | 7                    | 14.15 | 2.68 |
| Jeong 2018                                                                                     | M      | Oim <sup>-/-</sup>            | N.Oc       | F     | 16       | no/mm | 3       | 5.26  | 1.63 | 6                    | 2.58  | 0.81 |
| Jeong 2018                                                                                     | F      | Oim <sup>-/-</sup>            | N.Oc       | F     | 16       | no/mm | 3       | 7.37  | 1.30 | 7                    | 5.53  | 1.26 |
| Jeong 2018                                                                                     | M      | Oim <sup>-/-</sup>            | Oc.S/BS    | F     | 16       | %     | 3       | 12.55 | 3.72 | 6                    | 6.98  | 2.27 |
| Jeong 2018                                                                                     | F      | Oim <sup>-/-</sup>            | Oc.S/BS    | F     | 16       | %     | 3       | 18.26 | 1.63 | 7                    | 14.15 | 2.68 |
| Zimmerman 2018                                                                                 | M      | Oim <sup>-/-</sup>            | N.Oc       | LV    | 12       | no/mm | 8       | 1.33  | 1.33 | 8                    | 2.32  | 0.96 |
| Zimmerman 2018                                                                                 | M      | Oim <sup>-/-</sup>            | Oc.S/BS    | LV    | 12       | %     | 8       | 2.16  | 2.50 | 8                    | 4.96  | 1.85 |
| Wang 2019                                                                                      | NR     | Wnt1 <sup>prx1-/-</sup>       | N.Oc       | T     | 6        | no/mm | 6       | 5.71  | 2.17 | 6                    | 5.17  | 0.97 |
| Wang 2019                                                                                      | NR     | Wnt1 <sup>prx1-/-</sup>       | N.Oc       | T     | 12       | no/mm | 6       | 4.69  | 0.70 | 6                    | 3.52  | 0.56 |
| Wang 2019                                                                                      | NR     | Wnt1 <sup>prx1-/-</sup>       | ES/BS      | T     | 6        | no/mm | 6       | 4.11  | 1.25 | 6                    | 3.22  | 1.06 |
| Wang 2019                                                                                      | NR     | Wnt1 <sup>prx1-/-</sup>       | ES/BS      | T     | 12       | no/mm | 6       | 5.73  | 1.19 | 6                    | 3.78  | 0.70 |
| Greene 2021                                                                                    | F      | Col1a2 (+/G610C)              | N.Oc       | F     | 20       | ratio | 5       | 5.61  | 1.29 | 8                    | 2.93  | 0.42 |
| Vollersen 2021                                                                                 | F      | Wnt1 <sup>+G177C</sup>        | N.Oc       | F     | 4        | no/mm | 3       | 3.47  | 0.74 | 5                    | 2.62  | 0.51 |
| Vollersen 2021                                                                                 | F      | Wnt1 <sup>+G177C</sup>        | N.Oc       | F     | 12       | no/mm | 6       | 3.21  | 0.79 | 5                    | 2.40  | 0.72 |
| Vollersen 2021                                                                                 | F      | Wnt1 <sup>+G177C</sup>        | N.Oc       | F     | 24       | no/mm | 5       | 3.08  | 1.14 | 3                    | 5.15  | 0.12 |
| Vollersen 2021                                                                                 | M      | Wnt1 <sup>+G177C</sup>        | N.Oc       | F     | 4        | no/mm | 5       | 3.08  | 0.66 | 4                    | 3.24  | 0.63 |
| Vollersen 2021                                                                                 | M      | Wnt1 <sup>+G177C</sup>        | N.Oc       | F     | 12       | no/mm | 6       | 3.37  | 0.54 | 6                    | 2.47  | 1.27 |
| Vollersen 2021                                                                                 | M      | Wnt1 <sup>+G177C</sup>        | N.Oc       | F     | 24       | no/mm | 4       | 3.60  | 1.30 | 5                    | 2.91  | 1.33 |
| Vollersen 2021                                                                                 | F      | Wnt1 <sup>(G177C/G177C)</sup> | N.Oc       | F     | 4        | no/mm | 6       | 4.20  | 0.94 | 5                    | 2.62  | 0.51 |
| Vollersen 2021                                                                                 | F      | Wnt1 <sup>(G177C/G177C)</sup> | N.Oc       | F     | 12       | no/mm | 5       | 2.75  | 0.82 | 5                    | 2.40  | 0.72 |

| Animal studies of osteoclast-related parameter from bone histomorphometric analysis (continue) |        |                               |            |       |          |       |         |      |      |                      |      |      |
|------------------------------------------------------------------------------------------------|--------|-------------------------------|------------|-------|----------|-------|---------|------|------|----------------------|------|------|
| Author, year                                                                                   | Gender | Genotype                      | Parameters | Organ | Age (wk) | Unit  | OI mice |      |      | Healthy control mice |      |      |
|                                                                                                |        |                               |            |       |          |       | N       | Mean | SD   | N                    | Mean | SD   |
| Vollersen 2021                                                                                 | F      | Wnt1 <sup>(G177C/G177C)</sup> | N.Oc       | F     | 24       | no/mm | 5       | 3.79 | 0.71 | 3                    | 5.15 | 0.12 |
| Vollersen 2021                                                                                 | M      | Wnt1 <sup>(G177C/G177C)</sup> | N.Oc       | F     | 4        | no/mm | 6       | 3.79 | 1.48 | 4                    | 3.24 | 0.63 |
| Vollersen 2021                                                                                 | M      | Wnt1 <sup>(G177C/G177C)</sup> | N.Oc       | F     | 12       | no/mm | 5       | 5.10 | 0.56 | 6                    | 2.47 | 1.27 |
| Vollersen 2021                                                                                 | M      | Wnt1 <sup>(G177C/G177C)</sup> | N.Oc       | F     | 24       | no/mm | 8       | 3.41 | 1.15 | 5                    | 2.91 | 1.33 |

**Supplemental Figure 1: Subgroup analysis of collagen degradation markers from clinical data by sex of OI patients**

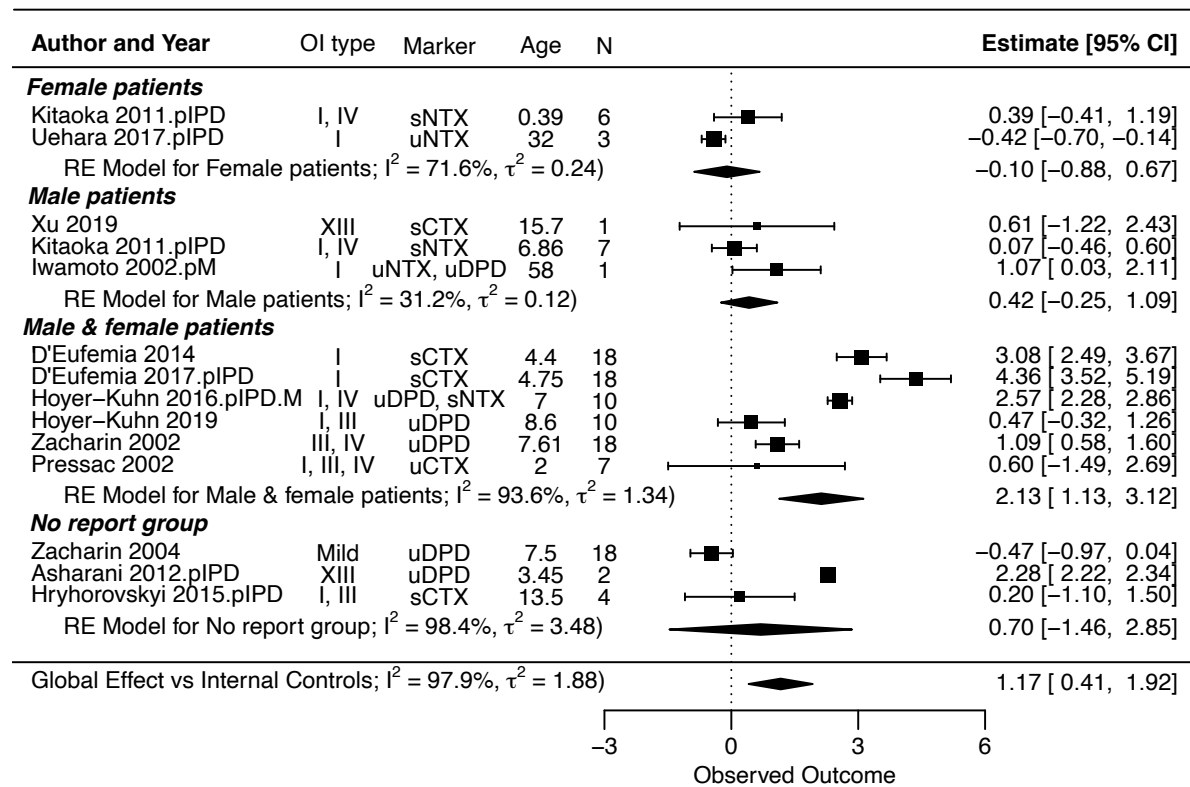

Forest plots of subgroup analysis by sex of OI patients. Indicated are the included studies, the OI type for reported patients for markers measured in the study; age of patients, and the number of patients. The standardized mean differences with 95% confidence interval (CI) for individual studies are depicted as squares/lines, the square size is proportional to the study weight. Diamonds/bands are global effect size and CI. Positive difference reflects higher values in OI. The heterogeneity statistics  $I^2$  and  $\tau^2$  are reported.

**Supplemental Figure 2. Subgroup analysis of collagen degradation markers from clinical data by type of markers**

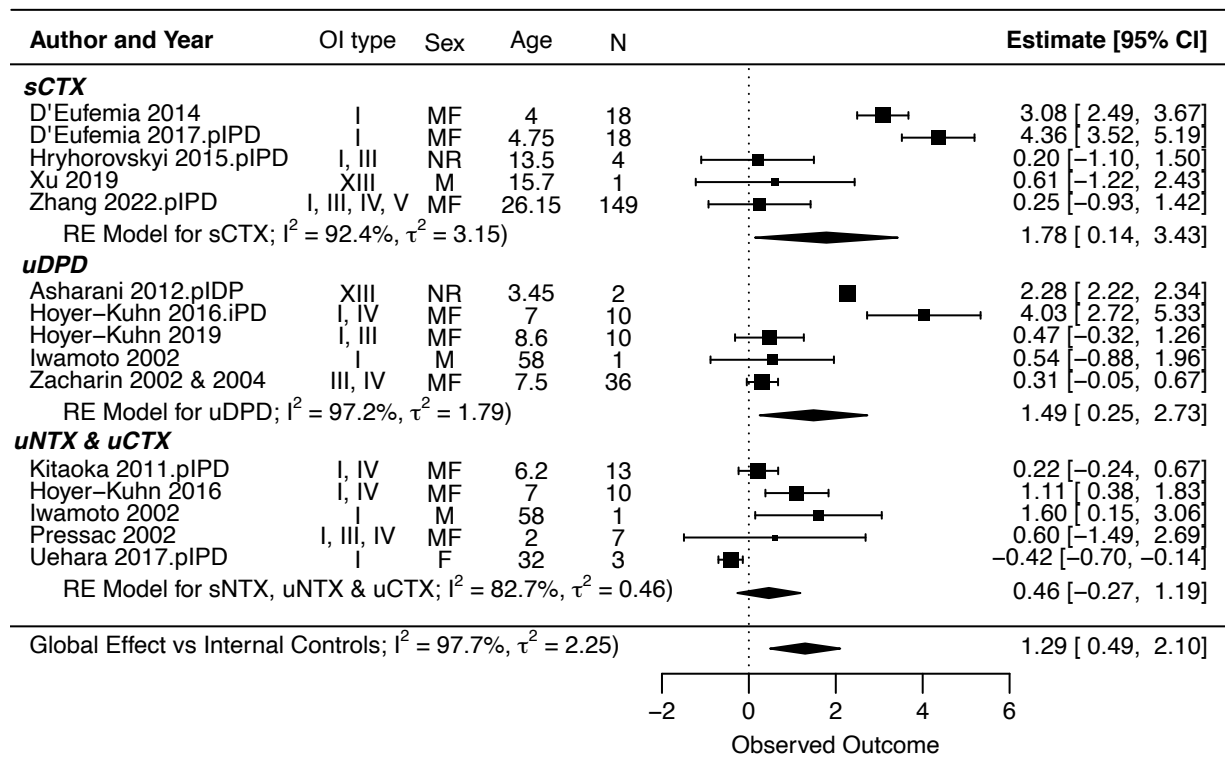

Forest plots of subgroup analysis by type of reported marker. Indicated are the included studies, the OI type for reported patients for markers measured in the study; sex of patients as male (M), female (F), mixed group of male and female (MF) and not reported (NR), age of patients, and the number of patients. The standardized mean differences with 95% confidence interval (CI) for individual studies are depicted as squares/lines, the square size is proportional to the study weight. Diamonds/bands are global effect size and CI. Positive difference reflects higher values in OI. The heterogeneity statistics  $I^2$  and  $\tau^2$  are reported.

**Supplemental Figure 3: Effect of biological factors on histomorphometric osteoclast parameters in OI mice.**

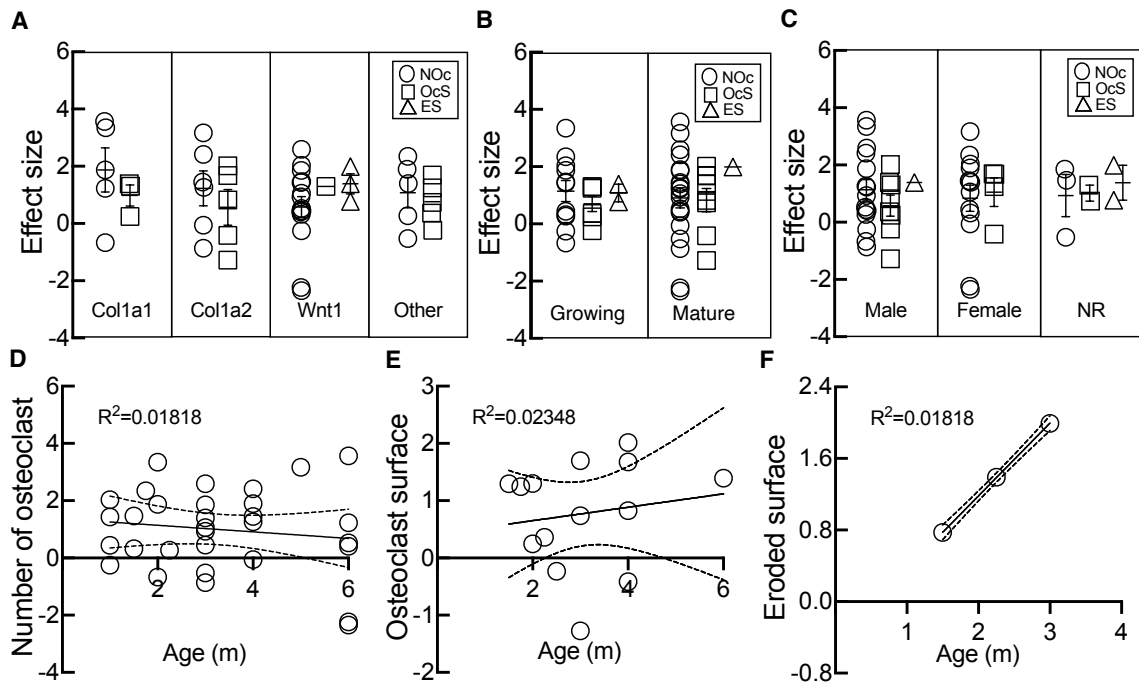

The effect sizes from individual outcomes for osteoclast numbers (NOc, circles), osteoclast surface (OcS, squares) or eroded surface (ES, triangles) reported in each study were separated by **(A)** the underlying mutation in *Colla1*, *Colla2*, *Wnt1* or other genes, **(B)** age grouped as growing (younger than 2 months) and mature (older than 3 months), and **(C)** reported sex of OI animal. Shown are means  $\pm$ SEM, no statistical significance by one-way ANOVA. Linear regression analysis for age effect on osteoclast numbers **(D)**, osteoclast surface **(E)** and eroded surface **(F)**.  $R^2$  indicates goodness of fit.



**Supplemental Figure 4: Publication bias, heterogeneity and sensitivity analyses for collagen degradation markers from clinical and animal studies**

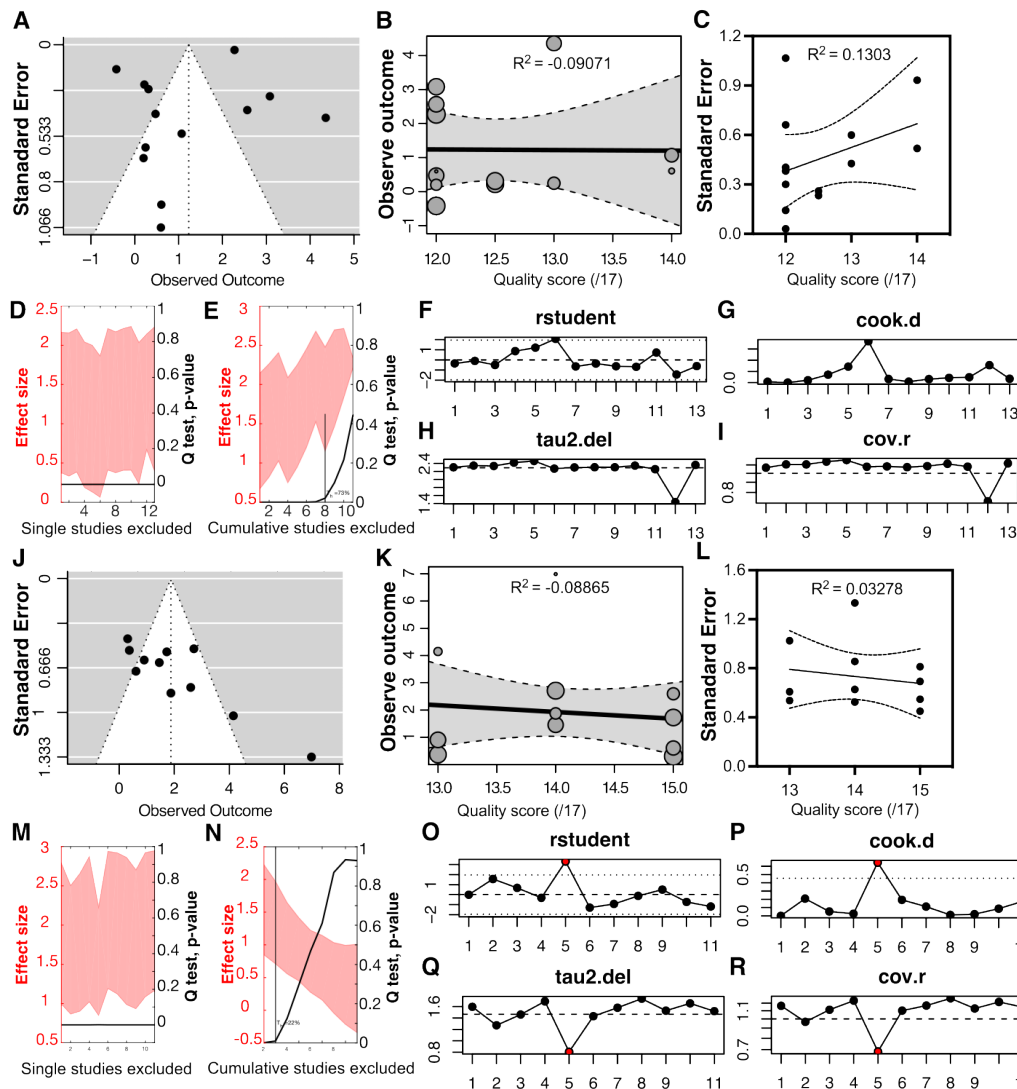

Analyses for collagen degradation markers from clinical and animal studies (A-I) and animal studies (J-R). Publication bias and quality of studies were assessed using funnel plot (A, J), meta-regression of observed outcome with quality score (B, K) and linear-regression of standard error with quality score (C, L). Heterogeneity was analyzed using single study exclusion (D, M) and cumulative study exclusion (E, N). Red area: 95% CI for the global effect size (left axis); line: p-value of Q test (right axis). Influential studies were analyzed using standardized residual (rstudent) (F, O), cook's distances (cook.d) (G, P), leave-one-out amount of heterogeneity (tau2.del) (H, Q) and covariance ratio (cov. r) (I, R).
